# Supplementary material for: Clinical efficacy and safety of topiroxostat in Japanese hyperuricemic patients with or without gout: a randomized, double-blinded, controlled phase 2b study
Source: PubMed Central journal article supplement (PMC5323498; doi:10.1007/s10067-016-3474-8), 2016-11-10
Supplement: 10067_2016_3474_MOESM2_ESM.pdf [file 10067_2016_3474_MOESM2_ESM.pdf]

**Table S2** Amount of change in serum urate level at the final visit from the level at baseline (FAS)

| Group | n  | Amount changes of serum urate level ( $\mu\text{mol/L}$ ) |                     |               |
|-------|----|-----------------------------------------------------------|---------------------|---------------|
|       |    | mean $\pm$ SD                                             | Statistics<br>Tukey |               |
| P     | 35 | $-22.4 \pm 63.6$                                          | P vs 120            | $P < 0.001^*$ |
|       |    |                                                           | P vs 160            | $P < 0.001^*$ |
| 120   | 39 | $-220.8 \pm 64.7$                                         | 120 vs 160          | $P = 0.559$   |
| 160   | 39 | $-243.0 \pm 82.1$                                         | Allo vs P           | $P < 0.001^*$ |
|       |    |                                                           | Allo vs 120         | $P = 0.986$   |
| Allo  | 38 | $-226.7 \pm 84.9$                                         | Allo vs 160         | $P = 0.773$   |

\* :  $P < 0.05$

P: Placebo group

120: Topiroxostat 120 mg group

160: Topiroxostat 160 mg group

Allo: Allopurinol group

Clinical efficacy and safety of topiroxostat in Japanese hyperuricemic patients with or without gout: a randomized, double-blinded, controlled phase 2b study

Submitted to Clinical Rheumatology

Authors: Tatsuo Hosoya, Tomomitsu Sasaki, Tetsuo Ohashi

Corresponding author: Tomomitsu Sasaki

Development Department, Medical R&D Division, Fuji Yakuhin Co., Ltd.

tomomitsu@fujiyakuhin.co.jp
